# Supplementary material
Source: MDPI journal article supplement (https://www.mdpi.com/2073-4395/11/11/2125)
Supplement: s1 [file s1]

**Supplementary Table S1.** Primers used for real time amplifications.

| Gene       | Function                                                   | Primers (5'-3')                                        | Size (bp) |
|------------|------------------------------------------------------------|--------------------------------------------------------|-----------|
| 18SrRNA    | 18S Ribosomal RNA                                          | F: CTACGTCCTGCCCTTTGTACA<br>R: ACACTTCACCGGACCATTCAA   | 65        |
| Os02g57800 | PPR repeat containing protein                              | F: GTCTTGAGTCTGTTGGAAGG<br>R: TGTCTGTAGCCAGTATGT       | 109       |
| Os03g07530 | OsFBK12 - F-box domain and Kelch repeat containing protein | F: CACTGGGTCTACTTCTCCTGTA<br>R: TTCATCTGGTGGCATCTTGG   | 96        |
| Os03g10750 | CUE domain containing protein                              | F: GTGGAGACTGAGCCTCAAATTA<br>R: GGATGCTGATGGAAGTGAAGA  | 102       |
| Os03g11420 | $\beta$ -glucosidase. ABA recycling.                       | F: CCACTACACCACCTACTACA<br>R: CCTATCTCCAATTGGCTTCC     | 127       |
| Os03g12530 | Cation efflux family protein                               | F: CCAAGATGCCACCAGATGAA<br>R: GCCATCGCAAACACAAGAAG     | 85        |
| Os03g12820 | ATP8                                                       | F: GAGAGGACAGATGAAGAAGGAC<br>R: CTAGTACCCTCGGAGTTTCTTG | 100       |
| Os06g06400 | NBS-LRR type disease resistance protein                    | F: GCTGAAGCTGAAGGAGATAGAG<br>R: TATCACTCTCGGGCGATTTG   | 103       |
| Os07g47470 | Pentatricopeptide                                          | F: GGGTGGCAGAGATGCTAAA<br>R: CAGCCTCAACCTTGGTGATA      | 117       |
| Os10g40390 | GRAS domain-containing protein                             | F: GGAATCAGAAGCCAGTAGAC<br>R: GCCACTATGCTTGCAATTC      | 97        |
| Os11g05540 | <i>rho</i> GAP domain containing protein                   | F: CCATTGACCGCACTGATGTA<br>R: CAGAGATGTGTCCTCCAGATTG   | 108       |
